# Supplementary material for: ERRF sensitizes ERBB2-positive breast cancer cells to lapatinib treatment likely by attenuating MCL1 and ERBB2 expression
Source: PubMed Central journal article supplement (PMC5482638; doi:10.18632/oncotarget.16425), 2017-03-21
Supplement: oncotarget-08-36054-s001.pdf [file oncotarget-08-36054-s001.pdf]

## **EREF sensitizes ERBB2-positive breast cancer cells to lapatinib treatment likely by attenuating MCL1 and ERBB2 expression**

### Supplementary Materials

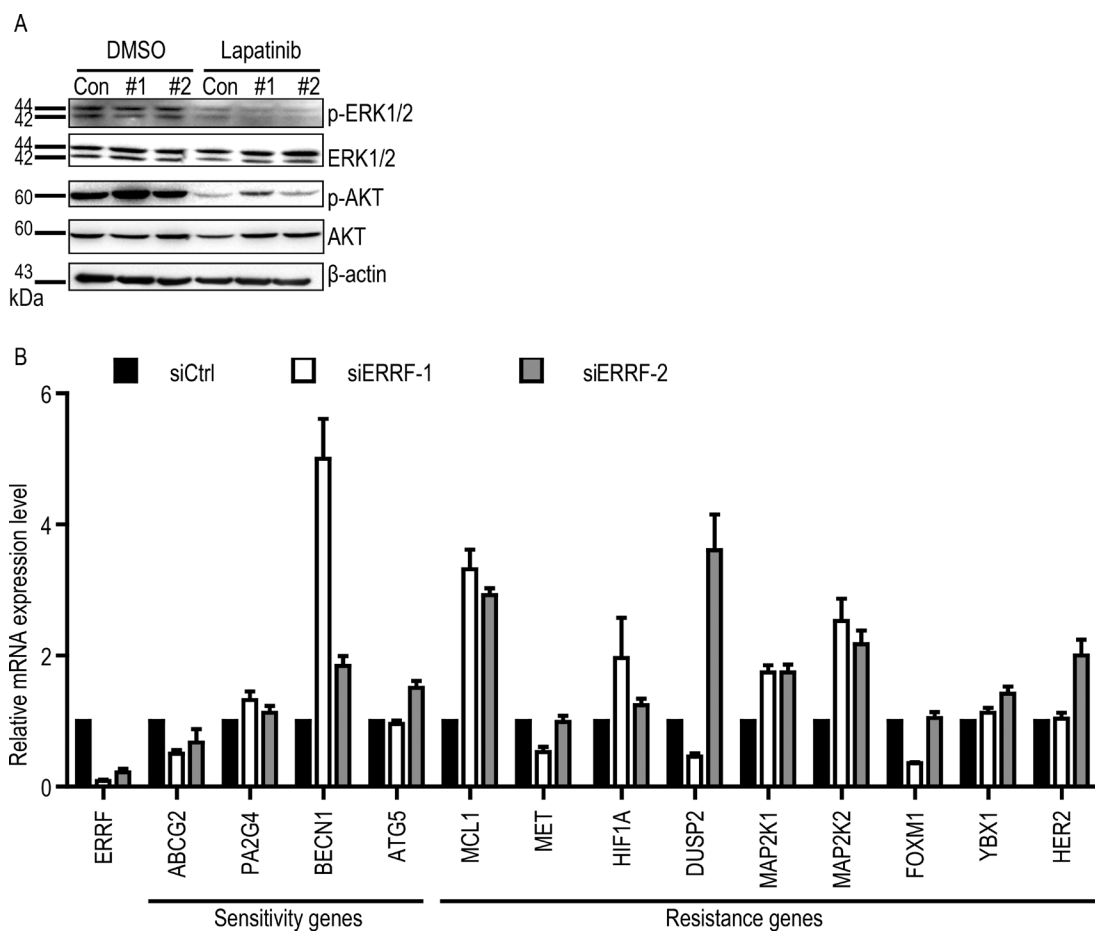

**Supplementary Figure 1: Knockdown of EREF has no obvious effect on the phosphorylation of ERK and AKT but altered the expression of multiple genes related to lapatinib sensitivity in BT-474 cells. (A)** Cells were transfected with control siRNA or *EREF* siRNA and then treated with lapatinib or DMSO control, and proteins were detected by western blotting. **(B)** Real-time PCR was used to detect gene expression in BT-474 cells transfected with siRNAs.

**Supplementary Table 1: Invasive breast carcinoma samples in which expression levels of both EREF and MCL1 are available in the TCGA database. See Supplementary\_Table\_1**
